# Supplementary material for: Minor adjustments in the chemical structures of pyridine derivatives induced different co-assemblies by O–H⋯N hydrogen bonds
Source: Royal Society of Chemistry journal article supplement (doi:10.1039/d2cc03859e), 2022-01-01
Supplement: d2cc03859e1.pdf [file d2cc03859e1.pdf]

## Supporting information for

### Minor adjustments in chemical structures of pyridine derivatives induced different co-assemblies by O-H...N hydrogen bond

Peng Lei<sup>a,b,e</sup>, Wendi Luo<sup>d,e</sup>, Bin Tu<sup>d,e</sup>, Xunwen Xiao<sup>a,\*</sup>, Qiaojun Fang<sup>d,e,\*</sup>, Chen Wang<sup>c,e,\*</sup>, Qingdao Zeng<sup>b,e,\*</sup>

<sup>a</sup> College of Chemical Engineering, Ningbo University of Technology, Ningbo 315211, China.

<sup>b</sup> CAS Key Laboratory of Standardization and Measurement for Nanotechnology, CAS Center for Excellence in Nanoscience, National Center for Nanoscience and Technology (NCNST), Beijing 100190, P. R. China

<sup>c</sup> CAS Key Laboratory of Biological Effects of Nanomaterials and Nanosafety, CAS Key Laboratory of Standardization and Measurement for Nanotechnology, CAS Center for Excellence in Nanoscience, National Center for Nanoscience and Technology (NCNST), Beijing 100190, P. R. China

<sup>d</sup> Laboratory of Theoretical and Computational Nanoscience, CAS Key Laboratory of Nanophotonic Materials and Devices, CAS Center for Excellence in Nanoscience, Beijing Key Laboratory of Ambient Particles Health Effects and Prevention Techniques, National Center for Nanoscience and Technology, Beijing 100190, P.R. China

<sup>e</sup> University of Chinese Academy of Sciences, Beijing 100049, P. R. China

#### Corresponding authors:

[zengqd@nanoctr.cn](mailto:zengqd@nanoctr.cn);

[wangch@nanoctr.cn](mailto:wangch@nanoctr.cn);

[fangqj@nanoctr.cn](mailto:fangqj@nanoctr.cn);

[xunwenxiao@nbut.edu.cn](mailto:xunwenxiao@nbut.edu.cn).

## Content

|                                                                                                                                                                              |     |
|------------------------------------------------------------------------------------------------------------------------------------------------------------------------------|-----|
| S1. Experimental section .....                                                                                                                                               | S3  |
| S2 The large scale STM image of H <sub>4</sub> BTE and H <sub>4</sub> BTY self-assembly structure at 1-heptanoic acid/HOPG interface .....                                   | S4  |
| S3 The large scale STM image of H <sub>4</sub> BTE/PDE, H <sub>4</sub> BTE/PEBP-C8 and H <sub>4</sub> BTY/PDE co-assembly structure at 1-heptanoic acid/HOPG interface ..... | S6  |
| S4 The large scale STM image of H <sub>4</sub> BTY/DPE and H <sub>4</sub> BTY/PEBP-C4 co-assembly structures at 1-heptanoic acid/HOPG interface.....                         | S7  |
| S5 The large scale STM image of H <sub>4</sub> BTY/PDE and H <sub>4</sub> BTY/PEBP-C8 co-assembly structures at 1-heptanoic acid/HOPG interface.....                         | S8  |
| S6 the summary of unit cell parameters and molecular densities of assembly structures.....                                                                                   | S9  |
| S7 the interaction between the adsorbates, the interaction between adsorbates and substrates, total energy and energy per unit area of assembly structures.....              | S10 |

## **S1. Experimental section**

### **1.1 Sample preparation**

Three pyridine derivatives PEBP-C4, PEBP-C6 and PEBP-C8 were synthesized according to the previous study<sup>38</sup>. PDE and DPE and two acid compounds H<sub>4</sub>BTE and H<sub>4</sub>BTY were bought from Jilin Chinese Academy of Sciences-Yanshen Technology Co. Ltd and they were utilized without further purification. Acid compounds were all dissolved into 1-heptanoic acid (HA) with the concentration about  $1 \times 10^{-5}$  mol/L. The pyridine derivatives were dissolved into HA with the concentration about  $1 \times 10^{-4}$  mol/L. After dissociating HOPG (grade ZYB, NTMDT, Russia) with ordinary scotch tape, fresh and clean HOPG was exposed, and corresponding solutions were added onto HOPG surface. After obtaining mono-component self-assembly structures, the pyridine solutions with concentrations less than  $1 \times 10^{-4}$  mol/L were added into the H<sub>4</sub>BTE or H<sub>4</sub>BTY systems.

### **1.2 STM detection**

The STM detections were all implemented on Nanoscope IIIa (Bruker, USA) instrument and Pt/Ir (80/20) wire was utilized as tips. The constant-current pattern was applied into instruments under atmospheric conditions and scanning conditions of STM images were depicted in figure captions. All STM images were obtained from more than three results with different tips to avert artifacts and they were polished by NanoScope analysis software.

### **1.3 DFT simulation**

The self-assembled mechanisms were probed by DMol<sup>3</sup> code and the periodic boundary conditions (PBC) were utilized for obtaining periodic molecular structures. Perdew and Wang parameterization was selected to achieve local exchange correlation and its energy was calculated by local spin density approximation when all-electrons adopted a medium grid and the convergence criterion was 10<sup>-5</sup> au during the field procedure. On the basis of STM images, the parameters and geometries of unit cells were optimized and the interaction energy of nanostructures were acquired till density convergence criterion were obtained. The infinite graphene monolayer was applied to simulate the HOPG and there are only two carbon atoms in the periodic orthorhombic unit cell, and the distance between them were 40 Å. Besides, the Brillouin zone was sampled by a 1 × 1 × 1 k-point mesh and the Gibbs free energy of the adsorbates  $E_{inter}$  were depended on the equation:  $E_{inter} = E_{tot(adsorbates/graphene)} - E_{ot(isolated/ adsorbates in vacuum)} - E_{tot(graphene)}$ .

**S2 The large scale STM image of H<sub>4</sub>BTE and H<sub>4</sub>BTY self-assembly structure at 1-heptanoic acid/HOPG interface**

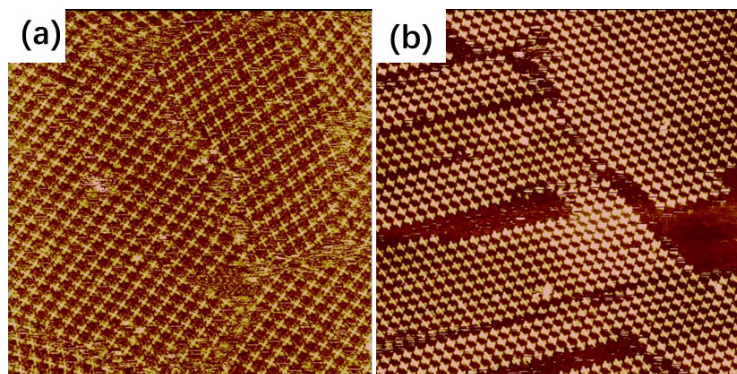

**Figure S1.** (a) The large scale STM image of H<sub>4</sub>BTE at HA/HOPG interface ( $I_{\text{set}}=281$  pA,  $V_{\text{bias}}=692$  mV, scan size: 83 nm×83 nm); (b) large-scale STM image of H<sub>4</sub>BTY at HA/HOPG interface ( $I_{\text{set}}=183$  pA,  $V_{\text{bias}}=894$  mV, scan size: 83 nm×83 nm).

**S3 The large scale STM image of H<sub>4</sub>BTE/PDE and H<sub>4</sub>BTE/PEBP-C8 co-assembly structure at 1-heptanoic acid/HOPG interface**

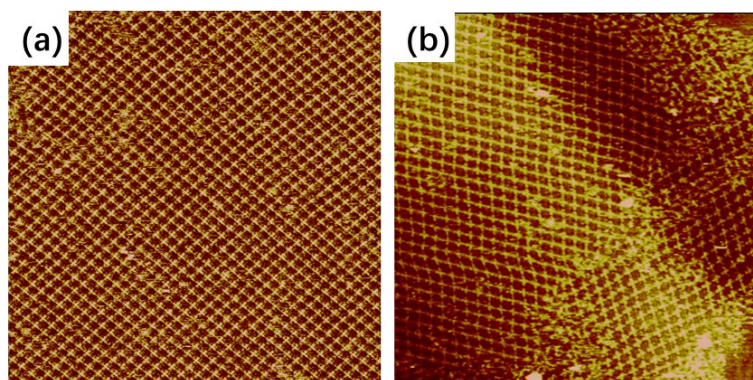

**Figure S2.** (a) Large-scale STM image of assembly structure when PDE was added into H<sub>4</sub>BTE system ( $I_{\text{set}}=327$  pA,  $V_{\text{bias}}=752$  mV, scan size: 84 nm×84 nm); (b) Large-scale STM image of assembly structure when PEBP-C8 was added into H<sub>4</sub>BTE system ( $I_{\text{set}}=242$  pA,  $V_{\text{bias}}=872$  mV, scan size: 76 nm×76 nm).

**S4 The large scale STM image of H<sub>4</sub>BTY/DPE and H<sub>4</sub>BTY/PEBP-C4 co-assembly structures at 1-heptanoic acid/HOPG interface**

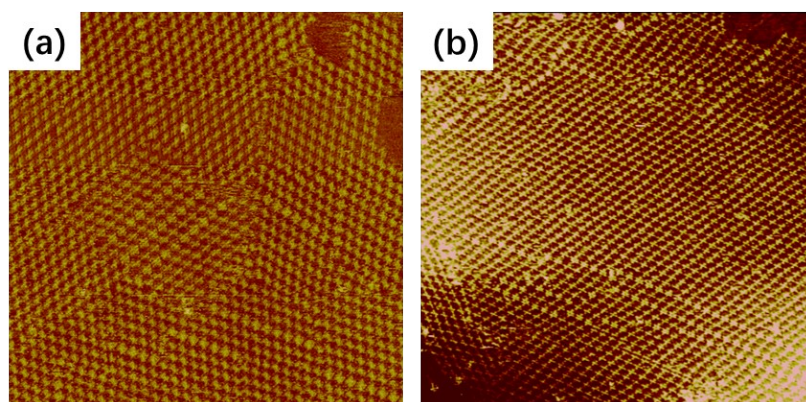

**Figure S3.** (a) Large-scale STM image of H<sub>4</sub>BTY/DPE co-assembly structure at HA/HOPG interface ( $I_{\text{set}}=418$  pA,  $V_{\text{bias}}=607$  mV, scan size: 82 nm×82 nm); (b) large-scale STM image of H<sub>4</sub>BTY/PEBP-C4 co-assembly structure at HA/HOPG interface ( $I_{\text{set}}=195$  pA,  $V_{\text{bias}}=866$  mV, scan size: 102 nm×102 nm).

**S5 The large scale STM image of H<sub>4</sub>BTY/PDE and H<sub>4</sub>BTY/PEBP-C8 co-assembly structures at 1-heptanoic acid/HOPG interface**

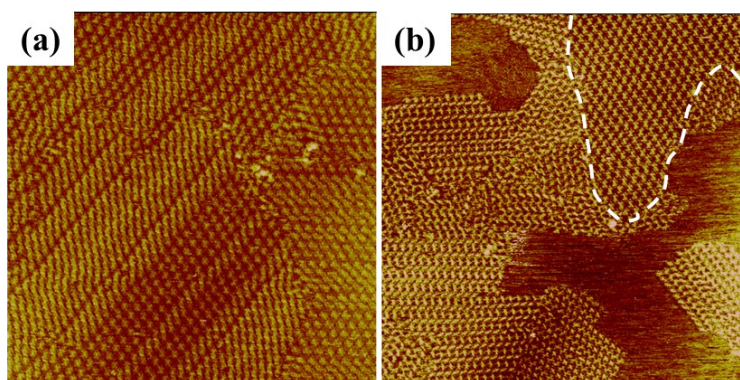

**Figure S4.** (a) Large-scale STM image of H<sub>4</sub>BTY/PDE co-assembly structure at HA/HOPG interface ( $I_{\text{set}}=383$  pA,  $V_{\text{bias}}=711$  mV, scan size: 79 nm×79 nm); (b) large-scale STM image of H<sub>4</sub>BTY/PEBP-C8 co-assembly structure at HA/HOPG interface ( $I_{\text{set}}=195$  pA,  $V_{\text{bias}}=866$  mV, scan size: 96 nm×96 nm).



**S6 the summary of unit cell parameters and molecular densities of assembly structures.**

**Table S1.** Summary of experimental (Expt.) and calculated (Cal.) parameters and molecular density (MD) of acid or pyridine in assembly structures H<sub>4</sub>BTE, H<sub>4</sub>BTY, H<sub>4</sub>BTY/PDE, H<sub>4</sub>BTY/PEBP-C6@1, H<sub>4</sub>BTY/PEBP-C6@2, H<sub>4</sub>BTY/PEBP-C8.

|                              |       | a (nm)  | b(nm)   | $\alpha$ (°) | MD of acids (nm <sup>-2</sup> ) | MD of pyridine (nm <sup>-2</sup> ) |
|------------------------------|-------|---------|---------|--------------|---------------------------------|------------------------------------|
| H <sub>4</sub> BTE           | Expt. | 2.0±0.1 | 2.5±0.1 | 102±1        | 0.20                            | /                                  |
|                              | Cal.  | 2.10    | 2.40    | 102.0        | 0.20                            | /                                  |
| H <sub>4</sub> BTY           | Expt. | 2.5±0.1 | 2.5±0.1 | 120±1        | 0.19                            | /                                  |
|                              | Cal.  | 2.40    | 2.40    | 120.0        | 0.20                            | /                                  |
| H <sub>4</sub> BTY/PDE       | Expt. | 2.0±0.1 | 2.5±0.1 | 63±1         | 0.23                            | 0.23                               |
|                              | Cal.  | 2.00    | 2.40    | 63.0         | 0.23                            | 0.23                               |
| H <sub>4</sub> BTY/PEBP-C6@1 | Expt. | 1.9±0.1 | 3.8±0.1 | 80±1         | 0.14                            | 0.14                               |
|                              | Cal.  | 1.90    | 3.80    | 80.0         | 0.14                            | 0.14                               |
| H <sub>4</sub> BTY/PEBP-C6@2 | Expt. | 2.7±0.1 | 2.9±0.1 | 100±1        | 0.26                            | 0.13                               |
|                              | Cal.  | 2.80    | 3.00    | 100.0        | 0.24                            | 0.12                               |
| H <sub>4</sub> BTY/PEBP-C8   | Expt. | 1.8±0.1 | 4.0±0.1 | 80±1         | 0.14                            | 0.14                               |
|                              | Cal.  | 1.80    | 4.00    | 80.0         | 0.14                            | 0.14                               |

**S7 the interaction between the adsorbates, the interaction between adsorbates and substrates, total energy and energy per unit area of assembly structures.**

**Table S2.** The total energies and energies per unit cell of assembly structures H<sub>4</sub>BTE, H<sub>4</sub>BTY, H<sub>4</sub>BTY/PDE, H<sub>4</sub>BTY/PEBP-C6@1, H<sub>4</sub>BTY/PEBP-C6@2, H<sub>4</sub>BTY/PEBP-C8.

|                              | Interactions between adsorbates (kcal mol <sup>-1</sup> ) | Interactions between adsorbates and substrate (kcal mol <sup>-1</sup> ) | total energy (kcal mol <sup>-1</sup> ) | total energy per unit area (kcal mol <sup>-1</sup> Å <sup>-2</sup> ) |
|------------------------------|-----------------------------------------------------------|-------------------------------------------------------------------------|----------------------------------------|----------------------------------------------------------------------|
| H <sub>4</sub> BTE           | -32.913                                                   | -34.881                                                                 | -67.794                                | -0.138                                                               |
| H <sub>4</sub> BTY           | -23.977                                                   | -48.632                                                                 | -72.610                                | -0.146                                                               |
| H <sub>4</sub> BTY/PDE       | -61.018                                                   | -63.437                                                                 | -124.455                               | -0.269                                                               |
| H <sub>4</sub> BTY/PEBP-C6@1 | -90.365                                                   | -70.168                                                                 | -160.533                               | -0.237                                                               |
| H <sub>4</sub> BTY/PEBP-C6@2 | -128.800                                                  | -128.548                                                                | -257.348                               | -0.311                                                               |
| H <sub>4</sub> BTY/PEBP-C8   | -80.971                                                   | -74.809                                                                 | -155.781                               | -0.220                                                               |
